# Supplementary material
Source: Springer Nature journal article supplement (https://www.springermedizin.de/resource/supplementary/12879_2010_1507_MOESM4_ESM.pdf/9442702)

## Rotavirus

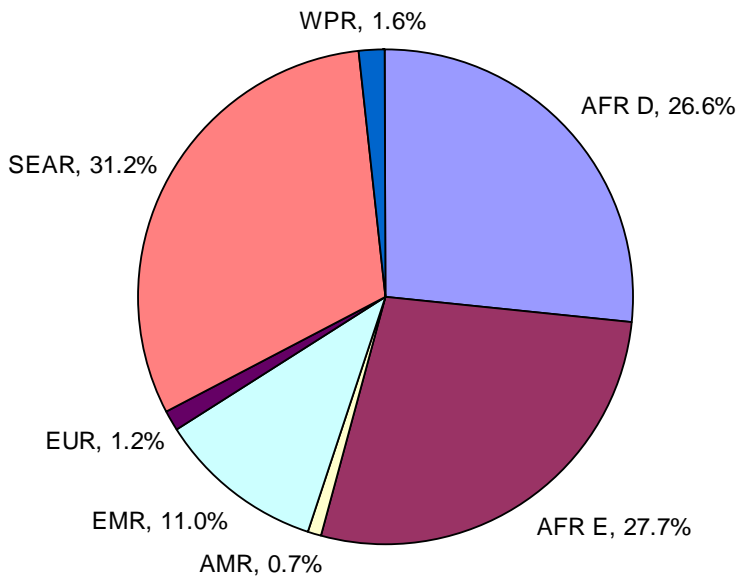

■ AFR D ■ AFR E ■ AMR ■ EMR ■ EUR ■ SEAR ■ WPR

## HPV

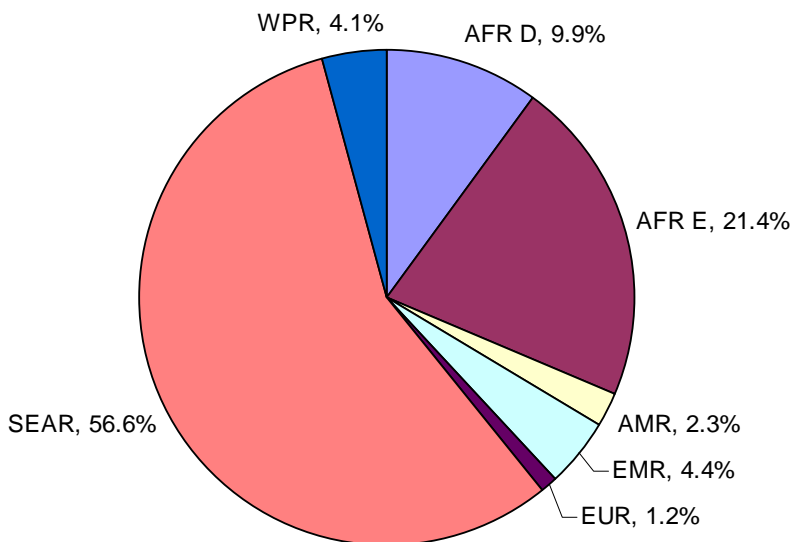

Supplement: MOESM4 [file 9442702]
